# Supplementary material for: Complexation of Am(iii) and Eu(iii) with DRAPA (N,N-dialkyl-6-amide-pyridine-2-carboxylic acid)
Source: Royal Society of Chemistry journal article supplement (doi:10.1039/d3dt02319b), 2023-01-01
Supplement: d3dt02319b1.pdf [file d3dt02319b1.pdf]

Electronic Supporting Information for:

## Complexation of Am(III) and Eu(III) with DRAPA (N,N-dialkyl-6-amide-pyridine-2-carboxylic acid)

Chao Xu,<sup>a</sup> Tingting Liu,<sup>a,b</sup> Qian Liu,<sup>b</sup> Suliang Yang,<sup>b</sup> Dingming Li<sup>a</sup> and Guoxin Tian<sup>\*a,b</sup>

a. College of Nuclear Science and Technology, Harbin Engineering University, Harbin, Heilongjiang, 150001, China.

b. Department of Radiochemistry, China Institute of Atomic Energy, Beijing, 102413, China.

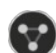

202209  
Am-DMAPA1-3.cif

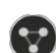

Eu-DMAPA1-3.cif

Cif file of AmL<sub>3</sub>, CCDC 2278529 and EuL<sub>3</sub>, CCDC 2278528

Table 1. Crystal data and structure refinement for AmL<sub>3</sub> and EuL<sub>3</sub> complexes

| Complex                                    | AmL <sub>3</sub>                                                 | EuL <sub>3</sub>                                                 |
|--------------------------------------------|------------------------------------------------------------------|------------------------------------------------------------------|
| Empirical formula                          | C <sub>27</sub> H <sub>27</sub> N <sub>6</sub> O <sub>9</sub> Am | C <sub>27</sub> H <sub>27</sub> N <sub>6</sub> O <sub>9</sub> Eu |
| Formula weight                             | 821.54                                                           | 731.58                                                           |
| Temperature, K                             | 100.00(10)                                                       | 100.01(10)                                                       |
| Crystal system                             | monocline, P2 <sub>1</sub> /c                                    | monocline, P2 <sub>1</sub> /c                                    |
| Unit cell dimensions                       | a = 1.471 nm<br>b = 1.940 nm<br>c = 1.227 nm                     | a = 1.470 nm<br>b = 2.072 nm<br>c = 1.222 nm                     |
| Volume, nm <sup>3</sup>                    | 3.297                                                            | 3.547                                                            |
| Z                                          | 4                                                                | 4                                                                |
| Density (calculated), g/cm <sup>3</sup>    | 1.655                                                            | 1.594                                                            |
| Absorption coefficient, μ/mm <sup>-1</sup> | 2.054                                                            | 1.703                                                            |
| F(000)                                     | 1588.0                                                           | 2004                                                             |
| Crystal size/mm                            | 0.15 × 0.15 × 0.15                                               | 0.2 × 0.2 × 0.2                                                  |
| Radiation parameter                        | Mo Kα (λ = 0.71073)                                              | Mo Kα (λ = 0.71073)                                              |
| Theta range for data collection<br>Θ, (°)  | 6.664 ~ 61.786                                                   | 6.502 ~ 59.528                                                   |
| Index ranges                               | -18 ≤ h ≤ 20,<br>-22 ≤ k ≤ 26,<br>-17 ≤ l ≤ 14                   | -19 ≤ h ≤ 19,<br>-21 ≤ k ≤ 20,<br>-28 ≤ l ≤ 27                   |
| Reflections collected                      | 34461                                                            | 19746                                                            |
| Independent reflections                    | 8262 [R <sub>int</sub> = 0.0825]                                 | 9946 [R <sub>int</sub> = 0.0414]                                 |
| Absorption correction                      | Semi-empirical from equivalents                                  | Semi-empirical from equivalents                                  |
| Refinement method                          | Full-matrix least-squares on F <sup>2</sup>                      | Full-matrix least-squares on F <sup>2</sup>                      |
| Data/restraints/parameters                 | 8262/12/394                                                      | 9946/26/394                                                      |
| Goodness-of-fit on F <sup>2</sup>          | 1.047                                                            | 1.026                                                            |
| Final R indices [I > 2σ(I)]                | R <sub>1</sub> = 0.0497,<br>wR <sub>2</sub> = 0.1174             | R <sub>1</sub> = 0.0370,<br>wR <sub>2</sub> = 0.0782             |
| R indices (all data)                       | R <sub>1</sub> = 0.0838,<br>wR <sub>2</sub> = 0.1314             | R <sub>1</sub> = 0.0478,<br>wR <sub>2</sub> = 0.0833             |
| Largest diff. peak and hole                | 3750, -2230 e · nm <sup>-3</sup>                                 | 1430, -970 e · nm <sup>-3</sup>                                  |
